# Supplementary material
Source: MDPI journal article supplement (https://www.mdpi.com/2673-7116/3/2/16)
Supplement: s1 [file s1]

## Supporting Information

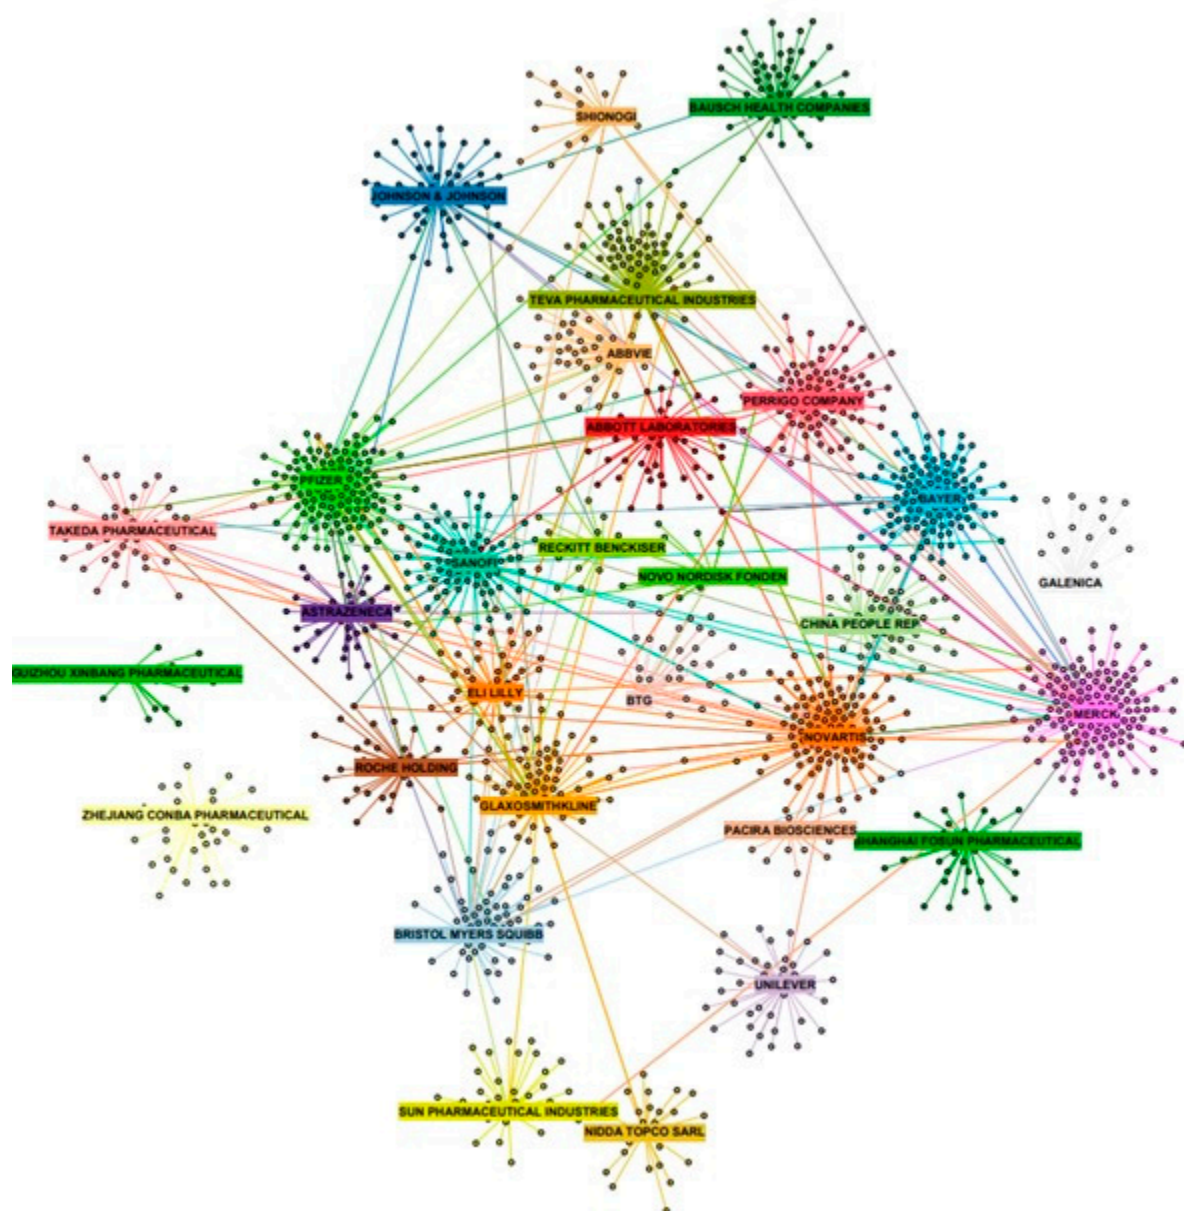

**Figure S1 Interactions between 30 major clusters with GUOs as hubs.**  
A high resolution image is included in the submission material

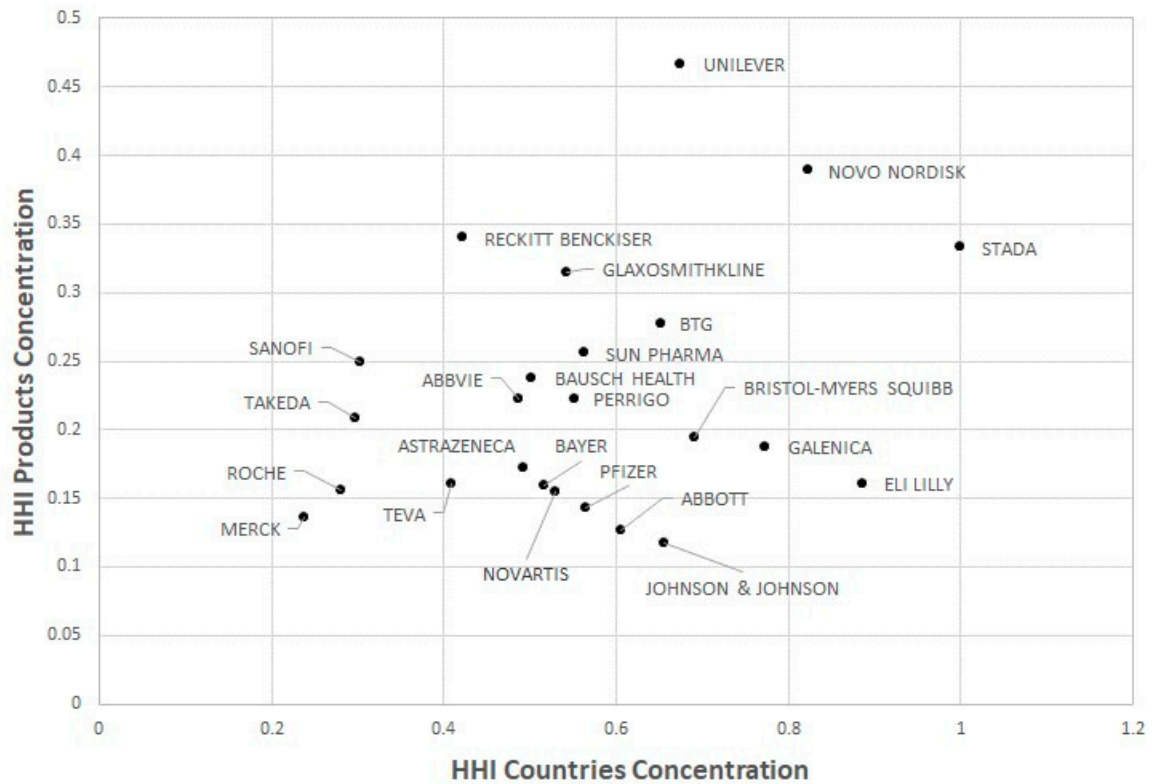

**Figure S2 The current structures of the major pharma GUOs**  
(Products and countries of deal making subsidiaries of the GUOs)

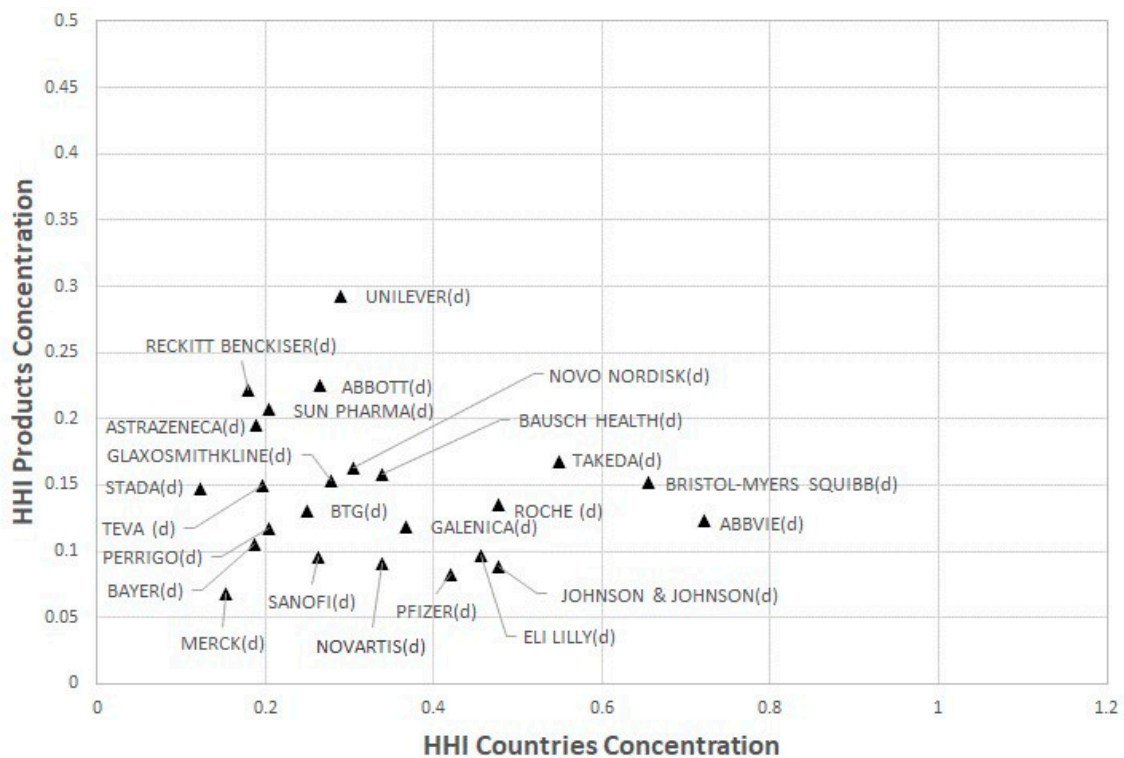

**Figure S3 The deals profiles of the major pharma GUOs**  
(Net products and countries of the GUOs deals as targets and acquirors)

**Table S1 Consolidated pharma product (and services) categories derived from Zephyr business categories**

| <b>No.</b> | <b>Business Offerings Group</b>                                                                           | <b>No.</b> | <b>Business Offerings Group</b>                         |
|------------|-----------------------------------------------------------------------------------------------------------|------------|---------------------------------------------------------|
| 1          | Animal health products related                                                                            | 18         | Drug discovery & development services                   |
| 2          | Biopharma marketing, distributor & wholesaler                                                             | 19         | Generics developer, manufacturer & wholesaler           |
| 3          | Biopharma product developer and / or manufacturer - diversified or other non-cancer & non-vaccine related | 20         | Medical instruments, lab material, devices & equipment  |
| 4          | Biopharma product developer and /or manufacturer - vaccines                                               | 21         | Other products & services                               |
| 5          | Biopharma product developer and/or manufacturer - cancer related                                          | 22         | Pharma developer                                        |
| 6          | Biopharma services - discovery, development & other                                                       | 23         | Pharma distributor                                      |
| 7          | Biotech development services                                                                              | 24         | Pharma ingredient, preparation, formulation & chemicals |
| 8          | Biotech product or component developer & manufacturer                                                     | 25         | Pharma manufacturer                                     |
| 9          | Consumer products - electronics                                                                           | 26         | Pharma marketing, retailer & packaging                  |
| 10         | Consumer products - food & nutrition                                                                      | 27         | Pharma wholesaler                                       |
| 11         | Consumer products - healthcare                                                                            | 28         | Platform developer, operator, software & mobile apps    |
| 12         | Consumer products - household                                                                             | 29         | R&D - Biopharma                                         |
| 13         | Consumer products - other                                                                                 | 30         | R&D - Biotech, drug delivery systems & medical devices  |
| 14         | Cosmetics & skincare                                                                                      | 31         | R&D - Cancer & vaccines related                         |
| 15         | Dental related                                                                                            | 32         | R&D - Other                                             |
| 16         | Diagnostic & testing related                                                                              | 33         | R&D - Pharma                                            |
| 17         | Drug delivery systems developer & manufacturer                                                            |            |                                                         |

**Table S2 Characteristics of 30 major hub GUOs (with degrees > 10)**

| Cluster | Hub firm of cluster                     | Hub Parent Country | Firms in cluster | No. of subsidiaries | Hub Degrees | Total deals | Countries of operation | Product categories |
|---------|-----------------------------------------|--------------------|------------------|---------------------|-------------|-------------|------------------------|--------------------|
| 1       | MERCK                                   | US                 | 134              | 291                 | 154         | 171         | 33                     | 191                |
| 2       | PFIZER                                  | US                 | 121              | 220                 | 141         | 158         | 39                     | 166                |
| 4       | NOVARTIS                                | DE                 | 111              | 260                 | 120         | 138         | 24                     | 171                |
| 3       | BAYER                                   | CH                 | 105              | 191                 | 128         | 149         | 27                     | 192                |
| 5       | PERRIGO COMPANY                         | IE                 | 89               | 67                  | 94          | 97          | 12                     | 86                 |
| 6       | SANOFI                                  | FR                 | 85               | 181                 | 94          | 108         | 31                     | 73                 |
| 8       | GLAXOSMITHKLINE                         | IE                 | 69               | 127                 | 79          | 100         | 22                     | 92                 |
| 7       | TEVA PHARMACEUTICAL                     | GB                 | 68               | 198                 | 81          | 108         | 36                     | 102                |
| 9       | BRISTOL MYERS SQUIBB                    | US                 | 67               | 106                 | 75          | 89          | 21                     | 65                 |
| 10      | JOHNSON & JOHNSON                       | US                 | 59               | 291                 | 64          | 67          | 24                     | 107                |
| 11      | CHINA NATIONAL/RESOURCES <sup>1,2</sup> | CN                 | 57               | 102                 | 56          | 63          | 4                      | 53                 |
| 12      | BAUSCH HEALTH COMPANIES                 | CA                 | 55               | 105                 | 55          | 60          | 10                     | 68                 |
| 13      | TAKEDA PHARMACEUTICAL                   | JP                 | 48               | 108                 | 53          | 54          | 23                     | 63                 |
| 14      | ABBOTT LABORATORIES                     | US                 | 47               | 184                 | 49          | 53          | 23                     | 70                 |
| 15      | ABBVIE                                  | US                 | 45               | 93                  | 47          | 54          | 14                     | 115                |
| 16      | ELI LILLY                               | US                 | 43               | 73                  | 47          | 51          | 13                     | 97                 |
| 18      | ASTRAZENECA                             | IN                 | 42               | 19                  | 43          | 44          | 12                     | 66                 |
| 17      | UNILEVER                                | GB                 | 40               | 70                  | 45          | 53          | 24                     | 43                 |
| 19      | ZHEJIANG CONBA PHARMA <sup>2</sup>      | CN                 | 37               | 13                  | 36          | 62          | 1                      | 57                 |
| 20      | ROCHE HOLDING                           | CH                 | 34               | 109                 | 35          | 39          | 18                     | 35                 |
| 21      | SHANGHAI FOSUN PHARMA <sup>2</sup>      | CN                 | 33               | 17                  | 32          | 41          | 2                      | 62                 |
| 22      | SUN PHARMACEUTICAL                      | IN                 | 31               | 39                  | 32          | 37          | 10                     | 40                 |
| 23      | BTG                                     | US                 | 30               | 8                   | 31          | 39          | 6                      | 40                 |
| 24      | STADA <sup>3</sup>                      | DE                 | 29               | 20                  | 29          | 32          | 11                     | 19                 |
| 25      | SHIONOGI <sup>2</sup>                   | JP                 | 24               | 15                  | 23          | 30          | 4                      | 19                 |
| 26      | GALENICA                                | CH                 | 16               | 9                   | 15          | 16          | 5                      | 29                 |
| 27      | RECKITT BENCKISER                       | GB                 | 14               | 22                  | 15          | 15          | 12                     | 18                 |
| 28      | NOVO NORDISK FONDEN                     | DK                 | 14               | 53                  | 14          | 21          | 13                     | 26                 |
| 29      | GUIZHOU XINBANG PHARMA <sup>2</sup>     | CN                 | 12               | 1                   | 11          | 16          | 1                      | 23                 |

| Cluster      | Hub firm of cluster             | Hub Parent Country | Firms in cluster | No. of subsidiaries | Hub Degrees | Total deals  | Countries of operation | Product categories |
|--------------|---------------------------------|--------------------|------------------|---------------------|-------------|--------------|------------------------|--------------------|
| 30           | PACIRA BIOSCIENCES <sup>2</sup> | US                 | 12               | 5                   | 12          | 17           | 2                      | 11                 |
| <b>TOTAL</b> |                                 | <b>n/a</b>         | <b>1,571</b>     | <b>2,997</b>        | <b>n/a</b>  | <b>1,982</b> | <b>n/a</b>             | <b>n/a</b>         |

<sup>1</sup>The cluster of firms having “China People Rep” as the GUO registered in the database could not be validated with other sources. An analysis of the major deal making firms grouped under this GUO concluded that this cluster consists of two major independent Chinese corporations, namely, China National Pharmaceutical Group Corporation and China Resources (Holdings) Co., Ltd. For reporting ease, we renamed this cluster as “China National / Resources”.

<sup>2</sup>The hub firms were China National / Resources, Zhejiang Conba Pharmaceutical, Shanghai Fosun Pharmaceutical, Shinogi, Guizhou Xinbang Pharmaceutical and Pacira Biosciences were eliminated from this study as outliers due to being disconnected with the network of the other 24 and having operations in less than 5 countries.

<sup>3</sup>The cluster having “Nidda Topco SARL” as the GUO name could not be validated with other sources with the exception of a minor mention in an annual report of STADA Arzneimittel AG. As STADA Arzneimittel AG was the most frequently occurring deal maker in this cluster and a major German pharmaceutical firm with no other mentioned holding firm, we renamed the GUO as STADA in further analyses.

**Table S3 Major countries concentration of head offices of subsidiaries of hub firms operating in more than 5 countries**

| Country     | TOTAL | MERCK | PFIZER | BAYER | NOVARTIS | PERRIGO | SANOFI | TEVA | GSK <sup>1</sup> | BMS <sup>2</sup> | J&J <sup>3</sup> | BAUSCH | TAKEDA | ABBOTT <sup>5</sup> | ABBVIE | ELI LILLY | UNILEVER | ASTRAZENECA | ROCHE <sup>6</sup> | SUN PHARMA <sup>7</sup> | BTG | STADA | GALENICA | RECKITT <sup>8</sup> | NOVO NORDISK <sup>9</sup> |
|-------------|-------|-------|--------|-------|----------|---------|--------|------|------------------|------------------|------------------|--------|--------|---------------------|--------|-----------|----------|-------------|--------------------|-------------------------|-----|-------|----------|----------------------|---------------------------|
| USA         | 216   | 19    | 28     | 12    | 7        | 8       | 4      | 12   | 6                | 18               | 17               | 11     | 12     | 14                  | 17     | 13        | 1        | 6           | 2                  | 7                       | 1   | 0     | 0        | 1                    | 0                         |
| Germany     | 53    | 14    | 4      | 26    | 1        | 0       | 1      | 0    | 0                | 0                | 2                | 0      | 2      | 1                   | 0      | 1         | 0        | 0           | 0                  | 0                       | 0   | 1     | 0        | 0                    | 0                         |
| France      | 47    | 6     | 2      | 4     | 5        | 0       | 21     | 1    | 2                | 2                | 0                | 0      | 0      | 0                   | 0      | 0         | 1        | 1           | 1                  | 0                       | 1   | 0     | 0        | 0                    | 0                         |
| UK          | 43    | 2     | 1      | 1     | 1        | 0       | 2      | 0    | 14               | 1                | 0                | 0      | 3      | 1                   | 0      | 0         | 4        | 6           | 0                  | 0                       | 2   | 0     | 0        | 5                    | 0                         |
| India       | 37    | 4     | 5      | 3     | 6        | 0       | 3      | 0    | 3                | 0                | 0                | 0      | 0      | 1                   | 0      | 2         | 2        | 1           | 0                  | 6                       | 0   | 0     | 0        | 1                    | 0                         |
| Switzerland | 24    | 2     | 1      | 0     | 15       | 0       | 0      | 0    | 0                | 0                | 1                | 0      | 0      | 0                   | 0      | 0         | 0        | 0           | 3                  | 0                       | 0   | 0     | 2        | 0                    | 0                         |
| Japan       | 20    | 1     | 0      | 2     | 2        | 0       | 4      | 0    | 0                | 0                | 0                | 0      | 10     | 0                   | 0      | 0         | 0        | 0           | 1                  | 0                       | 0   | 0     | 0        | 0                    | 0                         |
| Spain       | 19    | 3     | 1      | 3     | 2        | 0       | 1      | 1    | 1                | 0                | 1                | 0      | 0      | 2                   | 0      | 0         | 1        | 0           | 2                  | 0                       | 0   | 0     | 1        | 0                    | 0                         |
| Italy       | 13    | 3     | 4      | 0     | 2        | 0       | 0      | 0    | 0                | 2                | 0                | 0      | 0      | 0                   | 0      | 0         | 0        | 1           | 1                  | 0                       | 0   | 0     | 0        | 0                    | 0                         |
| Australia   | 12    | 2     | 2      | 0     | 0        | 0       | 1      | 2    | 2                | 1                | 0                | 0      | 0      | 0                   | 1      | 0         | 0        | 0           | 0                  | 0                       | 0   | 0     | 0        | 1                    | 0                         |
| Netherlands | 10    | 3     | 0      | 1     | 0        | 0       | 1      | 0    | 0                | 0                | 0                | 0      | 0      | 1                   | 1      | 1         | 1        | 1           | 0                  | 0                       | 0   | 0     | 0        | 0                    | 0                         |
| Canada      | 10    | 0     | 1      | 0     | 2        | 0       | 1      | 1    | 0                | 0                | 2                | 3      | 0      | 0                   | 0      | 0         | 0        | 0           | 0                  | 0                       | 0   | 0     | 0        | 0                    | 0                         |
| China       | 10    | 0     | 0      | 1     | 3        | 0       | 1      | 0    | 1                | 0                | 2                | 0      | 1      | 0                   | 0      | 0         | 0        | 1           | 0                  | 0                       | 0   | 0     | 0        | 0                    | 0                         |
| Ireland     | 9     | 0     | 3      | 0     | 1        | 1       | 0      | 1    | 0                | 1                | 0                | 0      | 0      | 0                   | 1      | 0         | 0        | 0           | 0                  | 0                       | 0   | 0     | 0        | 0                    | 1                         |
| Sweden      | 8     | 0     | 1      | 0     | 0        | 0       | 0      | 0    | 0                | 0                | 0                | 0      | 0      | 0                   | 0      | 0         | 0        | 7           | 0                  | 0                       | 0   | 0     | 0        | 0                    | 0                         |

**Table S4 Major pharma product (and services) categories concentration of subsidiaries of hub firms operating in more than 5 countries**

| Product Categories                | TOTAL | MERCK | PFIZER | BAYER | NOVARTIS | PERRIGO | SANOFI | TEVA | GSK <sup>1</sup> | BMS <sup>2</sup> | J&J <sup>3</sup> | BAUSCH | TAKEDA | ABBOTT <sup>5</sup> | ABBVIE | ELI LILLY | UNILEVER | ASTRAZENECA | ROCHE <sup>6</sup> | SUN PHARMA <sup>7</sup> | BTG | STADA | GALENICA | RECKITT <sup>8</sup> | NOVO NORDISK <sup>9</sup> |
|-----------------------------------|-------|-------|--------|-------|----------|---------|--------|------|------------------|------------------|------------------|--------|--------|---------------------|--------|-----------|----------|-------------|--------------------|-------------------------|-----|-------|----------|----------------------|---------------------------|
| Pharma manufacturer               | 250   | 26    | 26     | 16    | 16       | 4       | 29     | 9    | 24               | 14               | 10               | 8      | 13     | 6                   | 12     | 6         | 1        | 11          | 3                  | 8                       | 2   | 1     | 0        | 2                    | 3                         |
| Biopharma developer (a)           | 54    | 5     | 12     | 2     | 1        | 0       | 5      | 3    | 0                | 4                | 2                | 1      | 4      | 0                   | 1      | 3         | 0        | 9           | 1                  | 1                       | 0   | 0     | 0        | 0                    | 0                         |
| R&D – pharma                      | 51    | 2     | 4      | 1     | 1        | 0       | 2      | 2    | 7                | 5                | 3                | 3      | 5      | 3                   | 3      | 1         | 0        | 3           | 0                  | 2                       | 0   | 1     | 0        | 1                    | 2                         |
| Pharma developer                  | 42    | 5     | 6      | 0     | 2        | 0       | 0      | 5    | 4                | 1                | 2                | 5      | 1      | 3                   | 1      | 1         | 0        | 4           | 0                  | 1                       | 1   | 0     | 0        | 0                    | 0                         |
| Consumer products (a)             | 38    | 2     | 3      | 0     | 2        | 1       | 1      | 0    | 4                | 0                | 0                | 0      | 2      | 0                   | 0      | 0         | 22       | 0           | 1                  | 0                       | 0   | 0     | 0        | 0                    | 0                         |
| Pharma wholesaler                 | 37    | 8     | 6      | 5     | 1        | 1       | 2      | 1    | 1                | 2                | 1                | 1      | 1      | 1                   | 3      | 1         | 0        | 0           | 0                  | 0                       | 0   | 0     | 2        | 0                    | 0                         |
| Animal health products            | 35    | 6     | 10     | 6     | 4        | 2       | 0      | 3    | 0                | 0                | 0                | 0      | 0      | 0                   | 0      | 4         | 0        | 0           | 0                  | 0                       | 0   | 0     | 0        | 0                    | 0                         |
| Consumer products (b)             | 33    | 2     | 3      | 4     | 3        | 2       | 4      | 0    | 0                | 0                | 5                | 0      | 0      | 2                   | 0      | 0         | 1        | 2           | 2                  | 0                       | 0   | 0     | 0        | 2                    | 1                         |
| Diagnostic & testing              | 30    | 4     | 1      | 7     | 4        | 1       | 2      | 0    | 0                | 0                | 1                | 0      | 0      | 4                   | 0      | 1         | 0        | 0           | 3                  | 2                       | 0   | 0     | 0        | 0                    | 0                         |
| Cosmetics & skincare              | 25    | 1     | 1      | 0     | 0        | 0       | 4      | 0    | 1                | 3                | 5                | 2      | 0      | 0                   | 4      | 0         | 2        | 2           | 0                  | 0                       | 0   | 0     | 0        | 0                    | 0                         |
| Pharma components <sup>10</sup>   | 24    | 2     | 4      | 2     | 2        | 0       | 0      | 2    | 0                | 0                | 0                | 0      | 1      | 0                   | 0      | 0         | 0        | 3           | 0                  | 7                       | 0   | 0     | 1        | 0                    | 0                         |
| Medical instruments <sup>11</sup> | 16    | 1     | 2      | 2     | 0        | 0       | 2      | 0    | 0                | 0                | 3                | 0      | 0      | 5                   | 1      | 0         | 0        | 0           | 0                  | 0                       | 0   | 0     | 0        | 0                    | 0                         |
| Consumer products (c)             | 13    | 0     | 0      | 1     | 0        | 0       | 0      | 0    | 0                | 0                | 0                | 0      | 0      | 0                   | 0      | 0         | 7        | 0           | 0                  | 0                       | 0   | 0     | 0        | 5                    | 0                         |

**Table S5 Major countries concentration of head offices of connections of hub firms operating in more than 5 countries**

| Country     | TOTAL | MERCK | PFIZER | BAYER | NOVARTIS | PERRIGO | SANOFI | TEVA | GSK <sup>1</sup> | BMS <sup>2</sup> | J&J <sup>3</sup> | BAUSCH | TAKEDA | ABBOTT <sup>5</sup> | ABBVIE | ELI LILLY | UNILEVER | ASTRAZENECA | ROCHE <sup>6</sup> | SUN PHARMA <sup>7</sup> | BTG | STADA | GALENICA | RECKITT <sup>8</sup> | NOVO NORDISK <sup>9</sup> |
|-------------|-------|-------|--------|-------|----------|---------|--------|------|------------------|------------------|------------------|--------|--------|---------------------|--------|-----------|----------|-------------|--------------------|-------------------------|-----|-------|----------|----------------------|---------------------------|
| USA         | 712   | 54    | 85     | 41    | 57       | 15      | 42     | 33   | 41               | 56               | 40               | 30     | 25     | 28                  | 38     | 31        | 18       | 21          | 17                 | 12                      | 12  | 1     | 1        | 4                    | 10                        |
| Germany     | 132   | 8     | 10     | 7     | 18       | 8       | 7      | 2    | 14               | 7                | 1                | 0      | 2      | 2                   | 4      | 4         | 7        | 9           | 0                  | 0                       | 9   | 7     | 1        | 3                    | 2                         |
| France      | 102   | 23    | 6      | 26    | 10       | 4       | 5      | 1    | 3                | 1                | 1                | 1      | 3      | 2                   | 3      | 2         | 0        | 2           | 0                  | 0                       | 0   | 4     | 0        | 2                    | 3                         |
| UK          | 71    | 9     | 4      | 2     | 4        | 7       | 14     | 5    | 3                | 3                | 2                | 0      | 1      | 1                   | 3      | 0         | 4        | 3           | 1                  | 1                       | 1   | 0     | 1        | 1                    | 1                         |
| India       | 64    | 9     | 0      | 1     | 4        | 0       | 10     | 7    | 2                | 1                | 3                | 0      | 11     | 3                   | 0      | 0         | 0        | 1           | 7                  | 5                       | 0   | 0     | 0        | 0                    | 0                         |
| Switzerland | 61    | 1     | 3      | 1     | 3        | 35      | 3      | 1    | 4                | 0                | 2                | 0      | 1      | 0                   | 0      | 4         | 0        | 1           | 0                  | 0                       | 1   | 0     | 0        | 1                    | 0                         |
| Japan       | 56    | 6     | 2      | 3     | 9        | 0       | 0      | 1    | 5                | 4                | 2                | 1      | 4      | 0                   | 1      | 1         | 0        | 3           | 3                  | 1                       | 0   | 1     | 9        | 0                    | 0                         |
| Spain       | 52    | 8     | 5      | 9     | 0        | 14      | 3      | 5    | 2                | 1                | 0                | 0      | 0      | 3                   | 0      | 0         | 0        | 0           | 1                  | 0                       | 1   | 0     | 0        | 0                    | 0                         |
| Italy       | 49    | 2     | 9      | 5     | 7        | 1       | 4      | 0    | 4                | 0                | 2                | 0      | 0      | 2                   | 0      | 0         | 0        | 2           | 0                  | 10                      | 1   | 0     | 0        | 0                    | 0                         |
| Australia   | 45    | 6     | 2      | 5     | 3        | 2       | 0      | 21   | 0                | 1                | 2                | 0      | 0      | 1                   | 0      | 0         | 0        | 0           | 1                  | 1                       | 0   | 0     | 0        | 0                    | 0                         |
| Netherlands | 40    | 0     | 6      | 3     | 6        | 1       | 1      | 2    | 1                | 2                | 0                | 8      | 1      | 0                   | 0      | 2         | 0        | 1           | 0                  | 1                       | 3   | 0     | 0        | 0                    | 2                         |
| Canada      | 33    | 3     | 1      | 2     | 7        | 1       | 3      | 2    | 2                | 1                | 1                | 0      | 0      | 2                   | 0      | 0         | 1        | 2           | 2                  | 0                       | 1   | 1     | 1        | 0                    | 0                         |
| China       | 30    | 5     | 4      | 2     | 2        | 1       | 2      | 2    | 1                | 2                | 0                | 3      | 2      | 0                   | 0      | 0         | 1        | 2           | 0                  | 1                       | 0   | 0     | 0        | 0                    | 0                         |
| Ireland     | 29    | 9     | 1      | 0     | 5        | 2       | 0      | 3    | 0                | 1                | 0                | 1      | 0      | 2                   | 1      | 0         | 0        | 1           | 0                  | 0                       | 0   | 3     | 0        | 0                    | 0                         |
| Sweden      | 27    | 3     | 2      | 1     | 2        | 1       | 2      | 0    | 1                | 2                | 1                | 0      | 2      | 1                   | 0      | 0         | 2        | 3           | 0                  | 0                       | 0   | 1     | 3        | 0                    | 0                         |
| Argentina   | 25    | 3     | 2      | 2     | 1        | 0       | 0      | 1    | 2                | 0                | 1                | 0      | 0      | 0                   | 0      | 1         | 1        | 0           | 1                  | 0                       | 8   | 1     | 0        | 0                    | 1                         |



**Table S6 Major pharma product (and services) categories concentration of connections of hub firms (categories with counts >than 5)**

| Product Categories            | TOTAL | MERCK | PFIZER | BAYER | NOVARTIS | PERRIGO | SANOFI | TEVA | GSK <sup>1</sup> | BMS <sup>2</sup> | J&J <sup>3</sup> | BAUSCH | TAKEDA | ABBOTT <sup>5</sup> | ABBVIE | ELI LILLY | UNILEVER | ASTRAZENECA | ROCHE <sup>6</sup> | SUN PHARMA <sup>7</sup> | BTG | STADA | GALENICA | RECKITT <sup>8</sup> | NOVO NORDISK <sup>9</sup> |
|-------------------------------|-------|-------|--------|-------|----------|---------|--------|------|------------------|------------------|------------------|--------|--------|---------------------|--------|-----------|----------|-------------|--------------------|-------------------------|-----|-------|----------|----------------------|---------------------------|
| Pharma manufacturer           | 494   | 48    | 39     | 14    | 47       | 28      | 42     | 43   | 43               | 20               | 11               | 30     | 18     | 14                  | 18     | 11        | 2        | 17          | 11                 | 16                      | 6   | 11    | 2        | 3                    | 0                         |
| Biopharma developer (a)       | 179   | 14    | 16     | 7     | 13       | 0       | 18     | 17   | 10               | 17               | 8                | 1      | 13     | 0                   | 8      | 4         | 0        | 21          | 2                  | 2                       | 0   | 2     | 0        | 0                    | 6                         |
| R&D - pharma                  | 141   | 9     | 13     | 3     | 17       | 3       | 6      | 8    | 10               | 5                | 4                | 9      | 7      | 1                   | 13     | 2         | 1        | 5           | 5                  | 9                       | 7   | 1     | 1        | 0                    | 2                         |
| R&D - biopharma               | 107   | 8     | 15     | 3     | 12       | 0       | 16     | 2    | 18               | 8                | 1                | 4      | 5      | 0                   | 3      | 6         | 0        | 2           | 2                  | 0                       | 1   | 0     | 0        | 0                    | 1                         |
| Medical devices <sup>11</sup> | 98    | 9     | 3      | 3     | 5        | 5       | 3      | 5    | 0                | 0                | 17               | 10     | 0      | 12                  | 9      | 1         | 1        | 2           | 3                  | 0                       | 8   | 0     | 0        | 0                    | 2                         |
| Pharma developer              | 96    | 6     | 12     | 2     | 8        | 3       | 6      | 15   | 5                | 9                | 3                | 1      | 4      | 1                   | 8      | 4         | 0        | 2           | 2                  | 2                       | 0   | 1     | 2        | 0                    | 0                         |
| Pharma wholesaler             | 93    | 11    | 12     | 3     | 2        | 9       | 10     | 7    | 10               | 2                | 1                | 6      | 1      | 4                   | 3      | 0         | 0        | 1           | 1                  | 0                       | 0   | 5     | 4        | 1                    | 0                         |
| Cosmetics & skincare          | 73    | 5     | 4      | 8     | 0        | 9       | 3      | 0    | 6                | 0                | 3                | 7      | 0      | 0                   | 2      | 1         | 18       | 1           | 0                  | 5                       | 0   | 0     | 1        | 0                    | 0                         |
| Consumer products (b)         | 64    | 5     | 7      | 3     | 10       | 5       | 4      | 1    | 7                | 0                | 4                | 2      | 0      | 0                   | 1      | 0         | 8        | 2           | 0                  | 0                       | 0   | 0     | 1        | 4                    | 0                         |
| Animal health products        | 63    | 19    | 5      | 11    | 5        | 6       | 3      | 3    | 0                | 0                | 0                | 0      | 0      | 0                   | 0      | 9         | 1        | 1           | 0                  | 0                       | 0   | 0     | 0        | 0                    | 0                         |
| R&D – biotech                 | 60    | 6     | 8      | 1     | 4        | 0       | 8      | 1    | 3                | 2                | 2                | 1      | 1      | 7                   | 0      | 3         | 0        | 6           | 0                  | 1                       | 3   | 0     | 0        | 0                    | 3                         |
| Platform & software           | 59    | 8     | 5      | 6     | 3        | 10      | 4      | 0    | 2                | 2                | 4                | 0      | 0      | 5                   | 0      | 0         | 2        | 1           | 5                  | 0                       | 0   | 1     | 1        | 0                    | 0                         |
| Consumer products (a)         | 57    | 4     | 6      | 2     | 4        | 5       | 1      | 0    | 4                | 0                | 3                | 3      | 4      | 3                   | 1      | 0         | 12       | 1           | 0                  | 0                       | 0   | 3     | 0        | 1                    | 0                         |

| Product Categories              | TOTAL | MERCK | PFIZER | BAYER | NOVARTIS | PERRIGO | SANOFI | TEVA | GSK <sup>1</sup> | BMS <sup>2</sup> | J&J <sup>3</sup> | BAUSCH | TAKEDA | ABBOTT <sup>5</sup> | ABBVIE | ELI LILLY | UNILEVER | ASTRAZENECA | ROCHE <sup>6</sup> | SUN PHARMA <sup>7</sup> | BTG | STADA | GALENICA | RECKITT <sup>8</sup> | NOVO NORDISK <sup>9</sup> |
|---------------------------------|-------|-------|--------|-------|----------|---------|--------|------|------------------|------------------|------------------|--------|--------|---------------------|--------|-----------|----------|-------------|--------------------|-------------------------|-----|-------|----------|----------------------|---------------------------|
| Pharma components <sup>10</sup> | 54    | 6     | 6      | 5     | 1        | 3       | 2      | 5    | 3                | 2                | 1                | 3      | 1      | 1                   | 3      | 1         | 2        | 0           | 1                  | 6                       | 0   | 1     | 1        | 0                    | 0                         |
| Diagnostic & testing            | 54    | 3     | 4      | 9     | 10       | 0       | 5      | 2    | 1                | 6                | 1                | 1      | 2      | 4                   | 0      | 0         | 0        | 0           | 2                  | 0                       | 2   | 2     | 0        | 0                    | 0                         |
| Biotech developer <sup>14</sup> | 44    | 8     | 3      | 3     | 3        | 0       | 5      | 0    | 0                | 0                | 4                | 0      | 1      | 9                   | 0      | 3         | 0        | 0           | 1                  | 0                       | 4   | 0     | 0        | 0                    | 0                         |
| R&D - cancer & vaccines         | 44    | 5     | 5      | 2     | 5        | 0       | 0      | 3    | 7                | 5                | 0                | 0      | 1      | 0                   | 1      | 3         | 0        | 0           | 4                  | 0                       | 2   | 1     | 0        | 0                    | 0                         |
| Biopharma developer (b)         | 40    | 6     | 2      | 0     | 6        | 0       | 0      | 4    | 1                | 9                | 1                | 1      | 1      | 0                   | 1      | 0         | 0        | 0           | 4                  | 0                       | 1   | 1     | 0        | 0                    | 2                         |
| R&D – other                     | 35    | 2     | 5      | 2     | 0        | 1       | 1      | 1    | 3                | 2                | 0                | 1      | 0      | 1                   | 3      | 2         | 0        | 3           | 3                  | 1                       | 1   | 0     | 0        | 0                    | 3                         |
| Consumer products (c)           | 30    | 2     | 1      | 1     | 2        | 2       | 1      | 0    | 1                | 0                | 4                | 0      | 0      | 0                   | 0      | 0         | 11       | 0           | 0                  | 0                       | 0   | 0     | 0        | 5                    | 0                         |
| Drug discovery <sup>15</sup>    | 30    | 1     | 4      | 2     | 3        | 0       | 1      | 2    | 0                | 3                | 4                | 1      | 2      | 0                   | 2      | 1         | 0        | 1           | 1                  | 0                       | 2   | 0     | 0        | 0                    | 0                         |
| Pharma marketing                | 28    | 3     | 3      | 2     | 1        | 5       | 2      | 0    | 0                | 1                | 0                | 3      | 1      | 1                   | 0      | 0         | 0        | 1           | 0                  | 0                       | 0   | 2     | 3        | 0                    | 0                         |
| Generics manufacturer           | 26    | 2     | 3      | 0     | 3        | 2       | 0      | 8    | 2                | 0                | 0                | 0      | 0      | 1                   | 0      | 0         | 0        | 0           | 0                  | 3                       | 0   | 2     | 0        | 0                    | 0                         |
| Biopharma developer (c)         | 25    | 6     | 7      | 2     | 3        | 0       | 1      | 0    | 5                | 0                | 0                | 0      | 0      | 0                   | 0      | 1         | 0        | 0           | 0                  | 0                       | 0   | 0     | 0        | 0                    | 0                         |
| Other products                  | 23    | 1     | 1      | 1     | 2        | 1       | 2      | 3    | 1                | 1                | 1                | 1      | 1      | 0                   | 0      | 0         | 1        | 4           | 0                  | 0                       | 1   | 0     | 1        | 0                    | 0                         |
| Consumer products (d)           | 18    | 6     | 0      | 8     | 0        | 1       | 0      | 0    | 0                | 0                | 2                | 0      | 0      | 0                   | 0      | 0         | 1        | 0           | 0                  | 0                       | 0   | 0     | 0        | 0                    | 0                         |
| Pharma distributor              | 18    | 1     | 1      | 1     | 2        | 5       | 2      | 1    | 0                | 0                | 0                | 0      | 0      | 0                   | 0      | 0         | 0        | 1           | 0                  | 0                       | 0   | 2     | 2        | 0                    | 0                         |
| Dental related                  | 11    | 0     | 0      | 0     | 1        | 9       | 0      | 0    | 0                | 0                | 0                | 0      | 0      | 0                   | 0      | 0         | 0        | 1           | 0                  | 0                       | 0   | 0     | 0        | 0                    | 0                         |

<sup>1</sup>GSK = GlaxoSmithKline; <sup>2</sup>BMS = Bristol-Myers Squibb; <sup>3</sup>J&J = Johnson & Johnson; <sup>4</sup>Bausch = Bausch Health; <sup>5</sup>Abbott = Abbott Laboratories;

<sup>6</sup>Roche = Roche Holding; <sup>7</sup>Sun Pharma= Sun Pharmaceutical; <sup>8</sup>Reckitt = Reckitt Benckiser; <sup>9</sup>Novo Nordisk = Novo Nordisk Fonden

Biopharma developer (a) = biopharma product developer and/or manufacturer - diversified or other non-cancer & non-vaccine related

Biopharma developer (b) = Biopharma product developer and/or manufacturer - cancer related

Biopharma developer (c) = Biopharma product developer and/or manufacturer - vaccines

Consumer products (a) = Consumer products - food & nutrition

Consumer products (b) = Consumer products – healthcare

Consumer products (c) = Consumer products – household

Consumer products (d) = Consumer products – electronics

<sup>10</sup>Pharma components = Pharma ingredient, preparation, formulation & chemicals

<sup>11</sup>Medical devices = Medical instruments, lab material, devices & equipment

<sup>12</sup>R&D - Biotech = R&D - biotech, drug delivery systems & medical devices

<sup>13</sup>Platform & Software = Platform developer, operator, software & mobile apps

<sup>14</sup>Biotech developer = Biotech product or component developer & manufacturer

<sup>15</sup>Drug discovery = Drug discovery & development services

<sup>16</sup>Pharma marketing = Pharma marketing, retailer & packaging

<sup>17</sup>Generics manufacturer = Generics developer, manufacturer & wholesaler

<sup>18</sup>Other products = Other products & services
